# Supplementary material
Source: publisher figshare collection journal article supplement (https://gsapubs.figshare.com/ndownloader/files/23313818)
Supplement: Supplementary file 1 [file 23313818]

## **Spatially coherent late-Holocene Antarctic Peninsula surface air temperature variability**

### **SUPPLEMENTAL INFORMATION**

#### **Moss bank core collection and sampling**

Cores were collected in January 2012 (Elephant Island; 61.111°S, 54.824°W, Barrientos Island; 62.408°S, 59.753°W, Norsel Point; 64.759°S, 64.084°W) and January 2013 (Green Island; 65.322°S, 64.151°W, Leonie Island; 67.602°S, 68.343°W). Figure S1 shows a selection of sample locations, characteristics and coring approaches. Monoliths were carefully removed from non-permafrost near-surface sediments. Deeper cores were sampled using a permafrost corer (Nornberg et al., 2004) until the base of the moss bank was reached. All cores were stored at -20°C.

#### **Chronology and mass accumulation rates**

All  $^{14}\text{C}$  dates were measured on pure moss fragments and  $^{210}\text{Pb}$  activity was measured on bulk samples. Age-depth models for continuous cores were developed from conventional and post-bomb  $^{14}\text{C}$  and alpha-spectrometry  $^{210}\text{Pb}$  (Figure S2). Raw  $^{14}\text{C}$  dates and  $^{210}\text{Pb}$  ages derived from a constant rate of supply model (Appleby and Oldfield, 1978) were entered into the R package 'clam' (Blaauw, 2010) to develop smooth spline models using the minimum smoothing value (lower values resulting in more flexible models) at which age reversals did not occur in the majority of model iterations. All other settings were default. Mass accumulation rates ( $\text{g DM cm}^{-2} \text{ yr}^{-1}$ ) were calculated using the depth, modelled ages and bulk density values for contiguous samples; bulk density ( $\text{g cm}^{-3}$ ) was calculated by freeze drying samples of known volume. For ELE1 and ELE2, a hiatus was used in the age-depth model to

reflect the reported ages and stratigraphic context of the core. Details of all  $^{14}\text{C}$  and  $^{210}\text{Pb}$  dates and age-depth models are given in Tables S1 and S2 and age depth models are illustrated in Fig. S2.

All of our records suggested coherent age-depth models, although two moss banks have a hiatus (ELE1 and ELE2, Fig S1A and B). Whilst physical processes can affect moss bank growth dynamics at the edges (Fenton, 1982), the vertical accumulation patterns from our cores suggest that this does not affect the central moss bank areas.

### **Carbon stable isotopes**

Cellulose was extracted from moss samples using a standard protocol (Loader et al., 1997). For  $\delta^{13}\text{C}$  analysis, 1 mg samples of freeze-dried  $\alpha$ -cellulose were transferred to tin capsules and measured at the NERC Isotope Geoscience Laboratory (British Geological Survey) by combustion in a furnace connected on-line to a dual inlet isotope ratio mass spectrometer. Isotope ratios ( $^{13}\text{C}/^{12}\text{C}$ ) were referenced to the VPDB scale using within-run standards. Raw  $\delta^{13}\text{C}$  values were converted to carbon isotopic discrimination ( $\Delta^{13}\text{C}$ ) by reference to age depth models and records of global atmospheric  $\delta^{13}\text{C}$  from Antarctica (Schneider and Steig, 2008). Cellulose  $\Delta^{13}\text{C}$  represents a proxy for seasonal photosynthetic conditions (Royles et al., 2012; Seibt et al., 2008), with high discrimination values reflecting optimal hydration for maximum assimilation rates (Bramley-Alves et al., 2015).

### **Testate amoeba analysis**

Testate amoebae were used as a proxy for microbial productivity (Royles et al., 2013). Samples were prepared according to standard methodologies (Booth, 2010), with the size fraction between 300 and 15  $\mu\text{m}$  retained for microscopic analysis. Tests were counted and volumetric concentration values (tests  $\text{cm}^{-3}$ ) were calculated by the addition of an exotic

spore marker, with concentration per unit surface area over time (tests  $\text{cm}^{-2} \text{yr}^{-1}$ ) calculated from the age depth relationship. Minimum counts of 25 individuals were accepted for statistical analysis due to extremely low concentration in some samples.

Testate amoebae feed on bacteria and fine detritus and potentially other smaller protists. They are therefore partly dependent on the microbial community, which is in turn dependent on a complex set of variables including availability of plant material, temperature and moisture. However, the over-riding driver of microbial activity in moss communities is likely to be temperature, just as it is in soils, with availability of free water being the most common limiting factor during periods of freezing.

### **Correlation of temperature data with proxies**

To test the relationship between the proxy data and temperature, we correlated the testate amoebae productivity and mass accumulation rate from Green Island with annual and summer temperature from Vernadsky station (Table S1). This site was selected as it is the only location where there is a long instrumental temperature record (1951-present) sufficiently close to the available moss bank records. Temperature data were derived from mean monthly data, with summer temperatures calculated as the average of December, January and February. Daily data were unavailable so we could not calculate growing degree days as a measure of growing season length. The age of each sample used was the median age estimate from the age-depth models. Combined  $^{210}\text{Pb}$  and  $^{14}\text{C}$  dating generates precise age estimates and dating 95% uncertainty varies between 6 and <1 years for the period since 1951, generally with uncertainty reducing from 1951 to present. Correlation coefficients were calculated for all individual samples using their closest matched year of accumulation and for five year binned data, partly to allow for the dating uncertainty and partly to allow for the fact some samples spanned multiple years.

## Data compilation

Regional proxy temperature reconstructions were generated from combining the proxy data from the core data from Elephant island and Green Island. Only accumulation rate (g DM cm<sup>-2</sup> yr<sup>-1</sup>) and microbial productivity (i.e. testate amoeba concentration in tests cm<sup>-2</sup> yr<sup>-1</sup>) data were included in the standardised, binned records used for the compilation of temperature proxy data shown in Figure 3.  $\Delta^{13}\text{C}$  records were not used because the proxy is reflects a combination of temperature and moisture regimes. All sites and proxies were considered equally and no weighting of individual records was applied.

There was no common period over which all records could be standardised, so all raw proxy data were standardised over the whole length of their records to produce z-scores using the equation:

$$z = \frac{x - \mu}{\sigma}$$

Where  $z$  is the z-score (in SD units),  $x$  is the individual proxy value at any given date,  $\mu$  is the mean of all values in the individual dataset and  $\sigma$  is the standard deviation of all values in the individual dataset.

All data (i.e. including multiple cores/proxies) from ELE and GRE independently were averaged into 100 year bins to develop two individual site records (see Figure S4). For bins with values from both ELE and GRE, a mean value for used for the final regional record. Where there were only values from one site (i.e. 1000 – 1200 cal. BP and pre-1500 cal. BP), those values were used for the final regional record. Correlation coefficients were calculated for the 100 year binned data from the ice core and compiled moss bank record.

**Supplemental Figure DR1:** Examples of sampled moss banks and the extraordinary depths reached in these unusual circumstances. A, B and E show moss bank Elephant Island ELE 1 with deep exposed face and coring location (core depth 279cm, location S 61° 08' 36.1'' W 54° 42' 01.4'', 188 m asl); E shows depth of core indicated by length of core rods used; C shows exposed nature of Elephant Island ELE 2 (core length 200 cm, location S 61° 08' 26.5'' W 54° 41' 49.9''); D shows location of Elephant Island ELE3 in less exposed col area (core depth 33cm, location S 61° 08' 27.5'' W 54° 42' 39.8'', 169 m asl). F, G and H show large moss bank on Green Island where cores G1 and G2 were taken; F and G show sloping nature of site; H shows close up of surface microtopography. (G1 core: depth 97cm, location S: 65° 19' 23.2'' W: 064° 09' 04.9'', 65 m asl. G2 core: depth 66cm, location S: 65° 19' 23.8'' W: 064° 09' 05.6'' 67 m asl.).

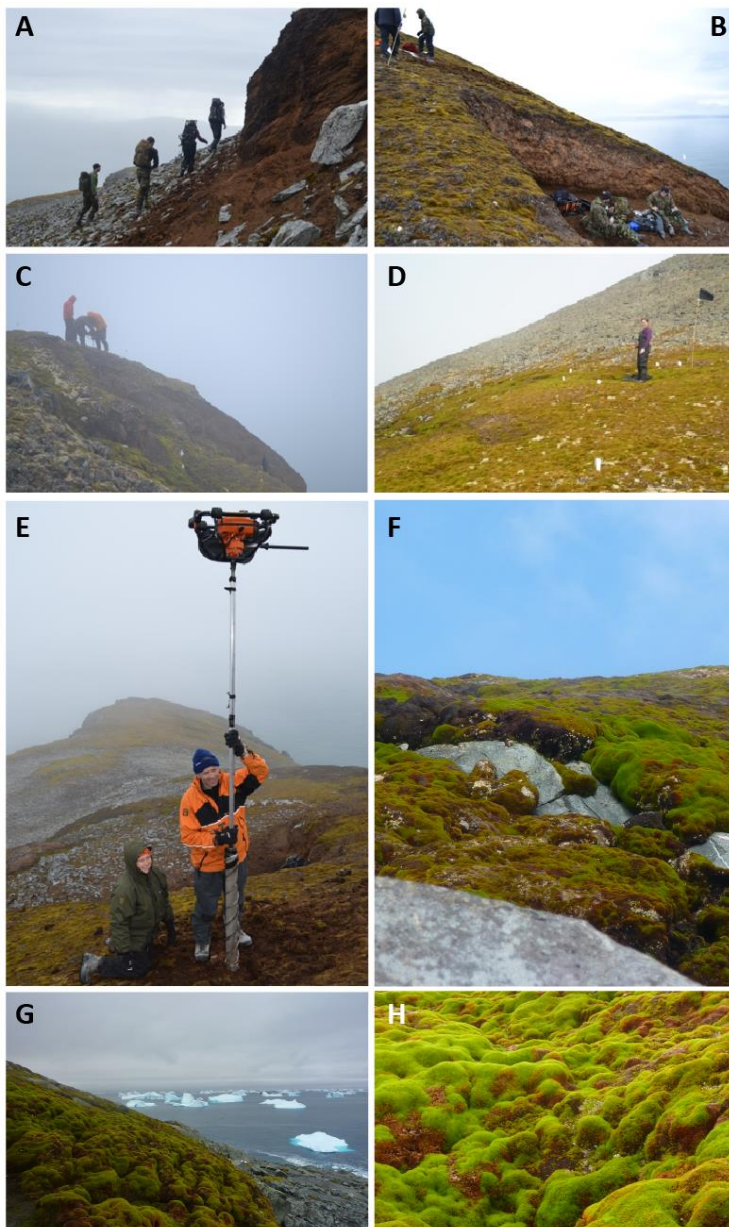

113 **Supplemental Figure DR2:** Age depth models for all sites. A = ELE1, B = ELE2, C =  
114 ELE3, D = G1, E = G2.  
115

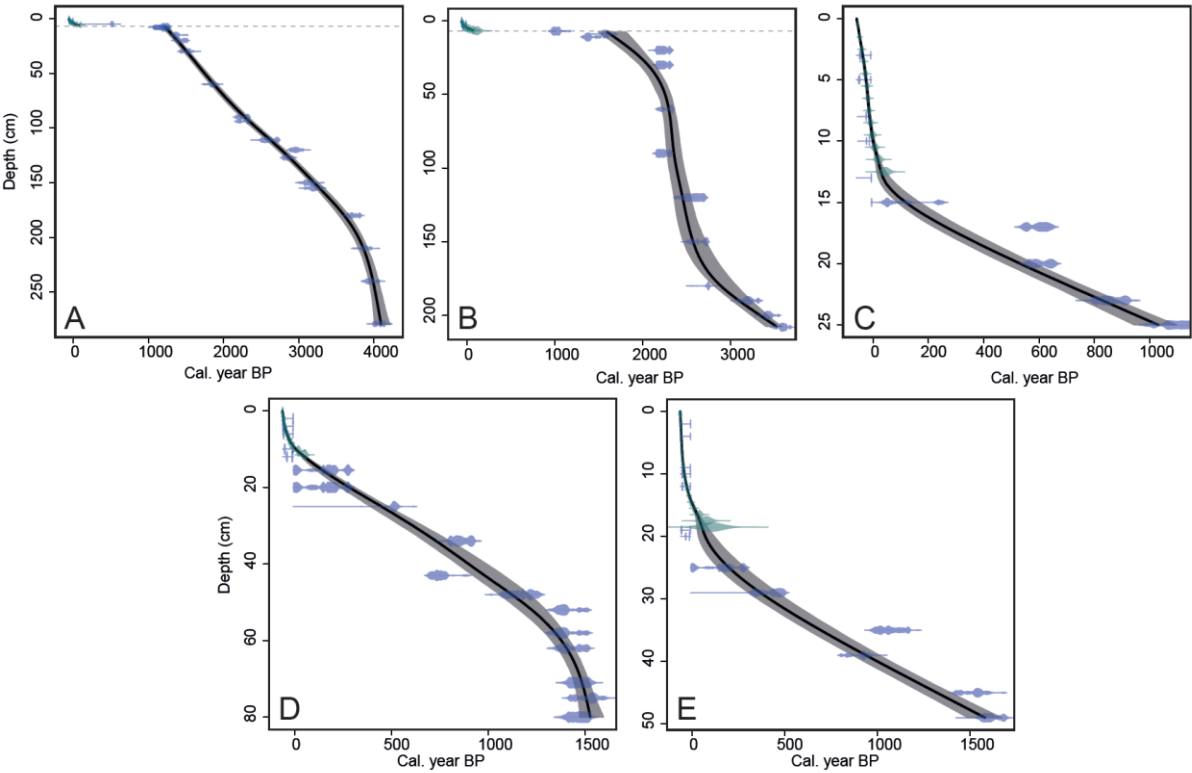

116

**Supplemental Figure DR3:** Changes in biological productivity at Elephant Island (A-C) and Green Island (D-F), shown as annual biomass accumulation (A, D), annual testate amoebae productivity (B, E), and  $\Delta^{13}\text{C}$  (C, F). Note change in x axis scale for last 200 years to show higher resolution changes.

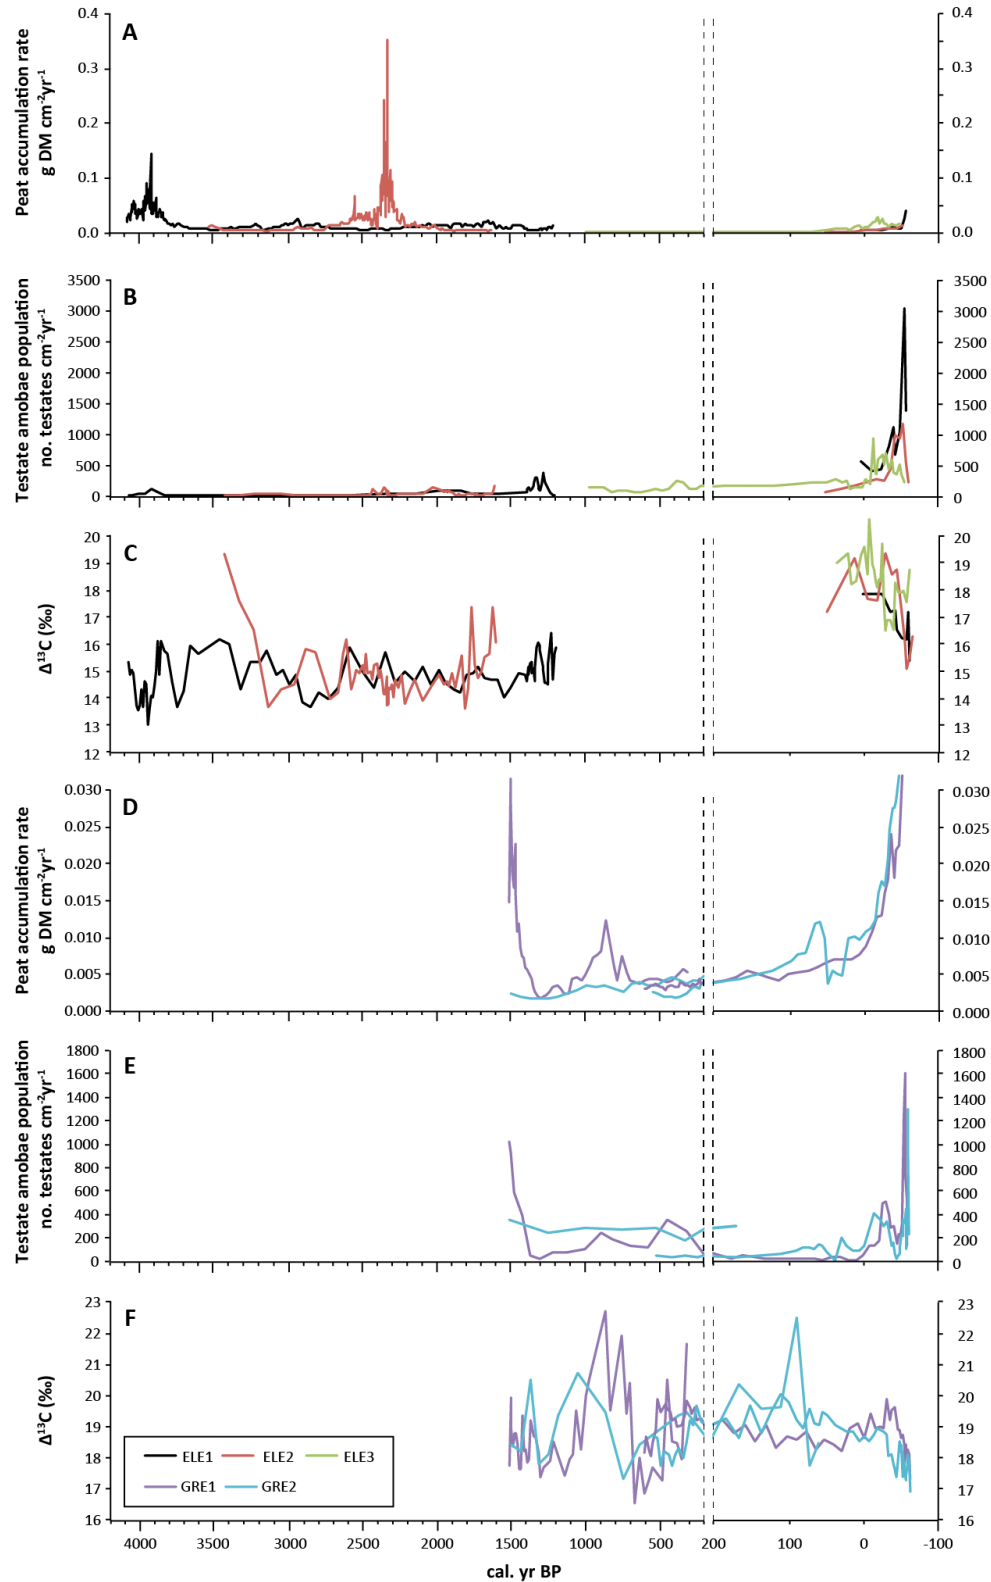

**Supplemental Table DR1:** Correlation coefficients (r) between the long instrumental temperature record at Vernadsky station and Green Island moss bank proxy records over the same period (cores G1 and G2). Correlations in bold p<0.05, except \*p=0.09. Temperature data are either mean annual or mean summer (DJF) and correlations were calculated both from using instrumental data from the estimated individual year of each individual fossil sample and using all data in five year bin sizes.

|                      | All data points |               |               | Five year bins |               |               |
|----------------------|-----------------|---------------|---------------|----------------|---------------|---------------|
|                      | n               | Mean annual T | Mean summer T | n              | Mean annual T | Mean summer T |
| G1 Testate           | <b>21</b>       | <b>0.50</b>   | <b>0.46</b>   | <b>11</b>      | <b>0.57*</b>  | 0.48          |
| G1 Accumulation rate | <b>21</b>       | <b>0.49</b>   | 0.28          | <b>11</b>      | <b>0.61</b>   | 0.35          |
| G2 Testate           | 26              | 0.04          | 0.08          | 13             | 0.24          | 0.07          |
| G2 Accumulation rate | <b>26</b>       | <b>0.47</b>   | 0.33          | <b>13</b>      | <b>0.64</b>   | 0.47          |



131 **Supplemental Table DR2: Radiocarbon dates from all sites**

132

| Identifier  | Site/core code | Sample depth (cm) | <sup>14</sup> C enrichment (absolute % modern carbon, $\pm 1\sigma$ ) | Conventional <sup>14</sup> C age ( $\pm 1\sigma$ ) |
|-------------|----------------|-------------------|-----------------------------------------------------------------------|----------------------------------------------------|
| SUERC-49590 | ELE1           | 2                 | 100.28 $\pm$ 0.44                                                     |                                                    |
| SUERC-46879 | ELE1           | 3                 | 109.41 $\pm$ 0.50                                                     |                                                    |
| SUERC-49591 | ELE1           | 5                 |                                                                       | 470 $\pm$ 37                                       |
| SUERC-49592 | ELE1           | 7                 |                                                                       | 1269 $\pm$ 37                                      |
| SUERC-49593 | ELE1           | 8                 |                                                                       | 1224 $\pm$ 35                                      |
| SUERC-46880 | ELE1           | 9                 |                                                                       | 1264 $\pm$ 37                                      |
| SUERC-49594 | ELE1           | 15                |                                                                       | 1482 $\pm$ 37                                      |
| SUERC-49595 | ELE1           | 20                |                                                                       | 1532 $\pm$ 35                                      |
| SUERC-43053 | ELE1           | 30                |                                                                       | 1628 $\pm$ 38                                      |
| SUERC-43056 | ELE1           | 60                |                                                                       | 1907 $\pm$ 38                                      |
| SUERC-43057 | ELE1           | 90                |                                                                       | 2257 $\pm$ 38                                      |
| SUERC-49596 | ELE1           | 94                |                                                                       | 2279 $\pm$ 37                                      |
| SUERC-49597 | ELE1           | 111               |                                                                       | 2516 $\pm$ 37                                      |
| SUERC-43058 | ELE1           | 120               |                                                                       | 2849 $\pm$ 35                                      |
| SUERC-49600 | ELE1           | 127               |                                                                       | 2755 $\pm$ 35                                      |
| SUERC-43059 | ELE1           | 150               |                                                                       | 2967 $\pm$ 38                                      |
| SUERC-49601 | ELE1           | 155               |                                                                       | 3011 $\pm$ 36                                      |
| SUERC-43060 | ELE1           | 180               |                                                                       | 3455 $\pm$ 36                                      |
| SUERC-43061 | ELE1           | 210               |                                                                       | 3578 $\pm$ 38                                      |
| SUERC-43062 | ELE1           | 240               |                                                                       | 3636 $\pm$ 38                                      |
| SUERC-43066 | ELE1           | 279               |                                                                       | 3729 $\pm$ 38                                      |
| SUERC-49603 | ELE2           | 2                 | 108.61 $\pm$ 0.48                                                     |                                                    |
| SUERC-49604 | ELE2           | 4                 | 114.85 $\pm$ 0.53                                                     |                                                    |
| SUERC-49605 | ELE2           | 7                 |                                                                       | 1114 $\pm$ 37                                      |
| SUERC-49606 | ELE2           | 9                 |                                                                       | 1679 $\pm$ 35                                      |
| SUERC-49607 | ELE2           | 11                |                                                                       | 1500 $\pm$ 37                                      |
| SUERC-49610 | ELE2           | 20                |                                                                       | 2220 $\pm$ 37                                      |
| SUERC-46881 | ELE2           | 30                |                                                                       | 2223 $\pm$ 37                                      |
| SUERC-46882 | ELE2           | 60                |                                                                       | 2278 $\pm$ 37                                      |
| SUERC-46885 | ELE2           | 90                |                                                                       | 2223 $\pm$ 37                                      |
| SUERC-49886 | ELE2           | 120               |                                                                       | 2475 $\pm$ 37                                      |
| SUERC-46887 | ELE2           | 150               |                                                                       | 2542 $\pm$ 37                                      |
| SUERC-46888 | ELE2           | 180               |                                                                       | 2604 $\pm$ 37                                      |
| SUERC-49611 | ELE2           | 190               |                                                                       | 3011 $\pm$ 37                                      |
| SUERC-49612 | ELE2           | 200               |                                                                       | 3214 $\pm$ 37                                      |
| SUERC-43063 | ELE2           | 208               |                                                                       | 3350 $\pm$ 38                                      |
| SUERC-54332 | ELE3           | 3                 | 111.56 $\pm$ 0.58                                                     |                                                    |
| SUERC-49613 | ELE3           | 5                 | 109.66 $\pm$ 0.48                                                     |                                                    |
| SUERC-54333 | ELE3           | 8                 | 138.83 $\pm$ 0.72                                                     |                                                    |
| SUERC-49614 | ELE3           | 10                | 142.59 $\pm$ 0.63                                                     |                                                    |
| SUERC-54334 | ELE3           | 13                | 103.10 $\pm$ 0.51                                                     |                                                    |
| SUERC-49616 | ELE3           | 15                |                                                                       | 43 $\pm$ 37                                        |
| SUERC-54335 | ELE3           | 17                |                                                                       | 589 $\pm$ 39                                       |

|               |      |      |                   |               |
|---------------|------|------|-------------------|---------------|
| SUERC-49617   | ELE3 | 20   |                   | $628 \pm 37$  |
| SUERC-54336   | ELE3 | 23   |                   | $953 \pm 39$  |
| SUERC-46889   | ELE3 | 25   |                   | $1175 \pm 37$ |
| SUERC-54349   | GRE1 | 2    | $104.30 \pm 0.54$ |               |
| SUERC-54352   | GRE1 | 4    | $105.35 \pm 0.54$ |               |
| SUERC-49627   | GRE1 | 6    | $109.62 \pm 0.51$ |               |
| SUERC-54353   | GRE1 | 10   | $117.26 \pm 0.61$ |               |
| SUERC-54354   | GRE1 | 12   | $106.82 \pm 0.49$ |               |
| SUERC-49631   | GRE1 | 15.5 |                   | $175 \pm 35$  |
| SUERC-49632   | GRE1 | 20   |                   | $182 \pm 35$  |
| SUERC-49633   | GRE1 | 25   |                   | $471 \pm 37$  |
| SUERC-54356   | GRE1 | 34   |                   | $955 \pm 37$  |
| SUERC-49634   | GRE1 | 43   |                   | $836 \pm 35$  |
| SUERC-54357   | GRE1 | 48   |                   | $1234 \pm 41$ |
| SUERC-49635   | GRE1 | 52   |                   | $1508 \pm 35$ |
| SUERC-49636   | GRE1 | 58   |                   | $1504 \pm 40$ |
| SUERC-54358   | GRE1 | 62   |                   | $1525 \pm 37$ |
| SUERC-49637   | GRE1 | 71   |                   | $1579 \pm 35$ |
| SUERC-49640   | GRE1 | 75   |                   | $1630 \pm 41$ |
| SUERC-49641   | GRE1 | 80   |                   | $1566 \pm 37$ |
| SUERC-54359   | GRE2 | 2    | $104.50 \pm 0.52$ |               |
| SUERC-54362   | GRE2 | 4    | $105.21 \pm 0.54$ |               |
| SUERC-49645   | GRE2 | 9    | $110.48 \pm 0.51$ |               |
| SUERC-49642   | GRE2 | 10   | $109.05 \pm 0.51$ |               |
| SUERC-54363   | GRE2 | 12   | $109.55 \pm 0.57$ |               |
| SUERC-49646   | GRE2 | 19   | $107.14 \pm 0.50$ |               |
| SUERC-49644   | GRE2 | 20   | $125.18 \pm 0.58$ |               |
| SUERC-49647   | GRE2 | 25   |                   | $187 \pm 37$  |
| SUERC-54364   | GRE2 | 29   |                   | $374 \pm 41$  |
| SUERC-54365   | GRE2 | 35   |                   | $1148 \pm 39$ |
| SUERC-49650   | GRE2 | 39   |                   | $1000 \pm 37$ |
| SUERC-54366   | GRE2 | 45   |                   | $1634 \pm 40$ |
| SUERC-49651   | GRE2 | 49   |                   | $1701 \pm 37$ |
| SUERC-44335   | ARD1 | 23   |                   | $490 \pm 37$  |
| SUERC-46900   | ARD2 | 16   | $102.62 \pm 0.47$ |               |
| SUERC-44336   | ARD3 | 20   |                   | $139 \pm 37$  |
| SUERC-46891   | BAR3 | 16   | $103.76 \pm 0.48$ |               |
| UCIAMS-133561 | BAR4 | 21   |                   | $2525 \pm 25$ |
| UBA-28841     | LEO  | 25   | $105.46 \pm 0.30$ |               |
| SUERC-46897   | NOR1 | 67   |                   | $1661 \pm 35$ |
| SUERC-46898   | NOR2 | 49   |                   | $42 \pm 37$   |
| SUERC-46899   | NOR3 | 44   |                   | $527 \pm 35$  |

134 **Supplemental Table DR3:** Alpha spectrometry  $^{210}\text{Pb}$  dating results and CRS (Constant Rate  
135 of Supply – see methods) modelled ages, with  $2\sigma$  error estimates, for all sites  
136

| Site/core code | Sample depth (cm) | Pb-210 activity (Bq/kg) | $\pm$ error | CRS modelled age (year AD) | $\pm$ error |
|----------------|-------------------|-------------------------|-------------|----------------------------|-------------|
| ELE1           | 0.5               | 55.29                   | 3.15        | 2009                       | 1           |
| ELE1           | 1                 | 61.04                   | 3.42        | 2007                       | 1           |
| ELE1           | 1.5               | 54.00                   | 2.89        | 2004                       | 1           |
| ELE1           | 2                 | 57.19                   | 3.25        | 1999                       | 2           |
| ELE1           | 2.5               | 61.58                   | 3.49        | 1995                       | 2           |
| ELE1           | 3                 | 81.28                   | 4.81        | 1989                       | 2           |
| ELE1           | 3.5               | 56.68                   | 2.97        | 1978                       | 2           |
| ELE1           | 4                 | 54.19                   | 2.94        | 1968                       | 2           |
| ELE1           | 4.5               | 36.46                   | 1.89        | 1955                       | 3           |
| ELE1           | 5                 | 31.93                   | 1.59        | 1938                       | 4           |
| ELE1           | 5.5               | 38.97                   | 0.92        | 1905                       | 6           |
| ELE1           | 6                 | 7.74                    | 0.61        | 1855                       | 11          |
| ELE2           | 0.5               | 44.13                   | 2.19        | 2011                       | 1           |
| ELE2           | 1                 | 59.95                   | 3.14        | 2009                       | 1           |
| ELE2           | 1.5               | 56.44                   | 3.22        | 2006                       | 1           |
| ELE2           | 2                 | 81.07                   | 3.44        | 2001                       | 1           |
| ELE2           | 2.5               | 66.84                   | 3.37        | 1996                       | 2           |
| ELE2           | 3                 | 66.45                   | 3.17        | 1990                       | 2           |
| ELE2           | 3.5               | 68.12                   | 3.32        | 1984                       | 2           |
| ELE2           | 4                 | 65.76                   | 3.11        | 1975                       | 2           |
| ELE2           | 4.5               | 59.47                   | 3.19        | 1964                       | 3           |
| ELE2           | 5                 | 55.15                   | 3.04        | 1950                       | 4           |
| ELE2           | 5.5               | 41.35                   | 3.43        | 1932                       | 5           |
| ELE2           | 6                 | 28.79                   | 2.57        | 1909                       | 7           |
| ELE2           | 6.5               | 18.66                   | 1.88        | 1877                       | 14          |
| ELE2           | 7                 | 10.75                   | 1.26        | 1835                       | 35          |
| ELE3           | 1                 | 34.63                   | 1.30        | 2006                       | 1           |
| ELE3           | 2                 | 34.68                   | 1.36        | 1999                       | 2           |
| ELE3           | 3                 | 27.00                   | 1.23        | 1991                       | 3           |
| ELE3           | 4                 | 27.12                   | 1.11        | 1984                       | 3           |
| ELE3           | 5                 | 23.71                   | 1.11        | 1978                       | 4           |
| ELE3           | 6                 | 21.78                   | 1.05        | 1972                       | 4           |
| ELE3           | 7                 | 19.04                   | 0.86        | 1969                       | 4           |
| ELE3           | 8                 | 21.28                   | 1.22        | 1965                       | 4           |
| ELE3           | 9                 | 22.01                   | 1.23        | 1959                       | 5           |
| ELE3           | 10                | 21.08                   | 1.02        | 1952                       | 6           |
| ELE3           | 11                | 21.92                   | 1.30        | 1944                       | 7           |
| ELE3           | 12                | 23.40                   | 1.40        | 1930                       | 9           |
| ELE3           | 13                | 22.26                   | 1.15        | 1906                       | 14          |
| GRE1           | 1                 | 14.88                   | 0.84        | 2010                       | 1           |
| GRE1           | 2                 | 14.00                   | 0.75        | 2008                       | 2           |

|      |    |       |      |      |    |
|------|----|-------|------|------|----|
| GRE1 | 3  | 19.53 | 1.03 | 2007 | 2  |
| GRE1 | 4  | 20.58 | 1.02 | 2004 | 2  |
| GRE1 | 5  | 34.81 | 1.66 | 1999 | 2  |
| GRE1 | 6  | 29.17 | 1.60 | 1992 | 2  |
| GRE1 | 7  | 23.69 | 1.11 | 1985 | 2  |
| GRE1 | 8  | 21.02 | 1.09 | 1977 | 3  |
| GRE1 | 9  | 22.81 | 1.12 | 1968 | 3  |
| GRE1 | 10 | 20.08 | 0.99 | 1956 | 4  |
| GRE1 | 11 | 24.31 | 1.23 | 1929 | 7  |
| GRE1 | 12 | 10.77 | 0.73 | 1898 | 10 |
| GRE2 | 1  | 11.01 | 0.65 | 2012 | 1  |
| GRE2 | 2  | 23.12 | 0.97 | 2011 | 1  |
| GRE2 | 3  | 21.74 | 0.89 | 2009 | 1  |
| GRE2 | 4  | 22.99 | 1.00 | 2008 | 1  |
| GRE2 | 5  | 22.60 | 1.09 | 2006 | 1  |
| GRE2 | 6  | 14.19 | 0.78 | 2004 | 1  |
| GRE2 | 7  | 25.06 | 1.05 | 2003 | 1  |
| GRE2 | 8  | 26.06 | 1.00 | 2000 | 1  |
| GRE2 | 9  | 27.28 | 1.07 | 1997 | 2  |
| GRE2 | 10 | 33.11 | 1.84 | 1993 | 2  |
| GRE2 | 11 | 28.89 | 1.10 | 1987 | 2  |
| GRE2 | 12 | 28.03 | 1.27 | 1981 | 2  |
| GRE2 | 13 | 23.99 | 1.05 | 1973 | 3  |
| GRE2 | 14 | 17.76 | 0.88 | 1965 | 3  |
| GRE2 | 15 | 21.92 | 1.52 | 1955 | 4  |
| GRE2 | 16 | 20.56 | 1.05 | 1939 | 5  |
| GRE2 | 17 | 19.76 | 0.98 | 1909 | 10 |
| GRE2 | 18 | 6.59  | 0.50 | 1873 | 26 |
| GRE2 | 19 | 6.79  | 0.46 | 1844 | 61 |

## SUPPLEMENTAL INFORMATION REFERENCES

- Appleby, P. G., and Oldfield, F., 1978, The calculation of lead-210 dates assuming a constant rate of supply of unsupported  $^{210}\text{Pb}$  to the sediment *Catena*, v. 5, p. 1-8.
- Blaauw, M., 2010, Methods and code for 'classical' age-modelling of radiocarbon sequences: *Quaternary Geochronology*, v. 5, p. 512-518.
- Booth, R. K. L., M.; Charman, D.J.; , 2010, Preparation and analysis of testate amoebae in peatland palaeoenvironmental studies: *Mires and Peat*, v. 7, p. 1-7.
- Bramley-Alves, J., Wanek, W., French, K., and Robinson, S. A., 2015, Moss delta C-13: an accurate proxy for past water environments in polar regions: *Global Change Biology*, v. 21, p. 2454-2464.
- Fenton, J. H. C., 1982, The formation of vertical edges on antarctic moss peat banks: *Arctic And Alpine Research*, v. 14, p. 21-26.
- Loader, N. J., Robertson, I., Barker, A. C., Switsur, V. R., and Waterhouse, J. S., 1997, An improved technique for the batch processing of small wholewood samples to alpha-cellulose: *Chemical Geology*, v. 136, p. 313-317.
- Nornberg, T., Goodsite, M. E., and Shotyk, W., 2004, An improved motorized corer and sample processing system for frozen peat: *Arctic*, v. 57, p. 242-246.
- Royles, J., Amesbury, M. J., Convey, P., Griffiths, H., Hodgson, D. A., Leng, M. J., and Charman, D. J., 2013, Plants and soil microbes respond to recent warming on the Antarctic Peninsula: *Current Biology*, v. 23, p. 1702-1706.
- Royles, J., Ogee, J., Wingate, L., Hodgson, D. A., Convey, P., and Griffiths, H., 2012, Carbon isotope evidence for recent climate-related enhancement of  $\text{CO}_2$  assimilation and peat accumulation rates in Antarctica: *Global Change Biology*, v. 18, p. 3112-3124.

162 Seibt, U., Rajabi, A., Griffiths, H., and Berry, J. A., 2008, Carbon isotopes and water use  
163 efficiency: sense and sensitivity: *Oecologia*, v. 155, p. 441-454.  
164 Schneider, D. P., and Steig, E. J., 2008, Ice cores record significant 1940s Antarctic warmth  
165 related to tropical climate variability: *Proceedings of the National Academy of*  
166 *Sciences of the United States of America*, v. 105, p. 12154-12158.
